# Supplementary material for: Management of Teeth with Grade 3 Endo-Periodontal Lesions by Combined Endodontic and Regenerative Periodontal Therapy
Source: MDPI journal article supplement (doi:10.3390/jcm13010093), 2023-12-23
Supplement: s1 [file s1]

**Table S1.** Results from final model for the change of radiographic bone level from  $T_0$  to  $T_{final}$ .

| <b>Fixed Effects</b> | <b>Estimate (SE)</b> | <b>P-value</b> |
|----------------------|----------------------|----------------|
| <b>(Intercept)</b>   | -2.30 (1.68)         | 0.18           |
| rBl at $T_0$         | 0.64 (0.13)          | <0.0001        |
| BOP <sub>final</sub> | -1.11 (0.05)         | 0.044          |
| <b>R2:</b>           | 0.408                |                |
